# Supplementary material for: Renal Cell Carcinoma: A Study through NMR-Based Metabolomics Combined with Transcriptomics
Source: Diseases. 2016 Jan 22;4(1):7. doi: 10.3390/diseases4010007 (PMC5456302; doi:10.3390/diseases4010007)
Supplement: Supplementary file 1 [file diseases-04-00007-s001.zip › diseases-04-00007-supplementary file 2.xls]

## Sheet: Table S2 
	Table S2. Canonical Pathways resulted to be present at significantly different levels in ccRCC patients.
	Canonical Pathways	-log(p-value)	Ratio	Molecules
	Pyruvate Fermentation to Lactate	3.6	0.5	pyruvic acid,L-lactic acid
	Glycine Biosynthesis III	3.6	0.5	L-alanine,pyruvic acid
	Alanine Degradation III	3.6	0.5	L-alanine,pyruvic acid
	Alanine Biosynthesis II	3.6	0.5	L-alanine,pyruvic acid
	Glycine Betaine Degradation	2.5	0.154	betaine,pyruvic acid
	Type II Diabetes Mellitus Signaling	2.09	0.0952	D-glucose,pyruvic acid
	HIF1α Signaling	1.86	0.5	pyruvic acid
	Alanine Biosynthesis III	1.86	0.5	L-alanine
	Thio-molybdenum Cofactor Biosynthesis	1.69	0.333	L-alanine
	L-serine Degradation	1.69	0.333	pyruvic acid
	Superpathway of Methionine Degradation	1.68	0.0588	betaine,pyruvic acid
	Hepatic Fibrosis / Hepatic Stellate Cell Activation	1.57	0.25	D-glucose
	IL-12 Signaling and Production in Macrophages	1.57	0.25	D-glucose
	Maturity Onset Diabetes of Young (MODY) Signaling	1.57	0.25	D-glucose
	Growth Hormone Signaling	1.57	0.25	D-glucose
	Creatine-phosphate Biosynthesis	1.57	0.25	creatine
	L-cysteine Degradation II	1.57	0.25	pyruvic acid

## Sheet: Table S3 
	Table S3. Pathways and molecules most differentially modulated in ccRCC patients generated from urinary metabolites obtained through variable size bucketing.
	Category	p-value	Molecules
	Liver Damage	0.00266	betaine,D-glucose
	Liver Inflammation/Hepatitis	0.00266	betaine,D-glucose
	Cardiac Transformation	0.00685	D-glucose
	Glomerular Injury	0.00685	D-glucose
	Renal Hypertrophy	0.00685	D-glucose
	Renal Inflammation	0.00685	creatine
	Renal Nephritis	0.00685	creatine
	Cardiac Proliferation	0.0137	D-glucose
	Renal Necrosis/Cell Death	0.0137	D-glucose
	Cardiac Necrosis/Cell Death	0.0204	D-glucose
	Kidney Failure	0.0271	citric acid,D-glucose
	Liver Dysfunction	0.0271	creatine
	Renal Dysfunction	0.0271	creatine
	Increased Levels of Creatinine	0.0338	creatine
	Renal Proliferation	0.0405	D-glucose
	Liver Steatosis	0.0471	betaine

## Sheet: Table S4 
	Table S4. Biological functions and molecules generated from comparative analysis of urinary metabolites modulated in ccRCC patients before and after nephrectomy and from gene differentially expressed in CD133+/CD24+ stem cells of ccRCC.
	Category	Dataset	p-value	Molecules
	Glomerular Injury	RCC-BN Metabolite dataset	0.00685	D-glucose
	Glomerular Injury	RCC CD133+/CD24+ cell gene expression dataset	0.0327	TNFRSF1A
	Renal Hypertrophy	RCC-BN Metabolite dataset	0.00685	D-glucose
	Renal Hypertrophy	RCC CD133+/CD24+ cell gene expression dataset	0.283	EDN1
	Renal Inflammation	RCC-BN Metabolite dataset	0.00685	creatine
	Renal Inflammation	RCC-AN Metabolite dataset	0.00533	creatine
	Renal Inflammation	RCC CD133+/CD24+ cell gene expression dataset	0.0644	TANK,HBEGF,PRKCD,TNFRSF1A,HIF1A,BCL2,TICAM1,EP300,VCAM1,NFE2L2
	Renal Nephritis	RCC-BN Metabolite dataset	0.00685	creatine
	Renal Nephritis	RCC-AN Metabolite dataset	0.00533	creatine
	Renal Nephritis	RCC CD133+/CD24+ cell gene expression dataset	0.0644	TANK,HBEGF,PRKCD,TNFRSF1A,HIF1A,BCL2,TICAM1,EP300,VCAM1,NFE2L2
	Renal Necrosis/Cell Death	RCC-BN Metabolite dataset	0.0137	D-glucose
	Renal Necrosis/Cell Death	RCC CD133+/CD24+ cell gene expression dataset	0.00956	HBEGF,PPM1A,TNFRSF1A,TICAM1,CASP9,IRS1,ATG7,PIAS1,PRDX3,BECN1,TMEM123,IKBKG,GNAQ,PRKCD,MAP2K4,NAMPT,BCL2,HIF1A,EDN1,RHOT1,NFE2L2
	Kidney Failure	RCC-BN Metabolite dataset	0.0271	citric acid,D-glucose
	Kidney Failure	RCC-AN Metabolite dataset	0.00533	citric acid,creatinine
	Kidney Failure	RCC CD133+/CD24+ cell gene expression dataset	0.307	BCL2,EDN1,PKD2
	Renal Dysfunction	RCC-BN Metabolite dataset	0.0271	creatine
	Renal Dysfunction	RCC-AN Metabolite dataset	0.0212	creatine
	Increased Levels of Creatinine	RCC-BN Metabolite dataset	0.0338	creatine
	Increased Levels of Creatinine	RCC-AN Metabolite dataset	0.0264	creatine
	Renal Proliferation	RCC-BN Metabolite dataset	0.0405	D-glucose
	Renal Proliferation	RCC CD133+/CD24+ cell gene expression dataset	0.208	USF1,EDN1
	Increased Levels of LDH	RCC-BN Metabolite dataset	0.141	D-glucose
	Increased Levels of LDH	RCC CD133+/CD24+ cell gene expression dataset	0.0078	SLC9A1,EDN1,ITGB2

## Sheet: Table S5 
	Table S5. Biological processes and molecules generated from comparative analysis of urinary metabolites modulated in ccRCC patients before and after nephrectomy and from gene differentially expressed in CD133+/CD24+ stem cells of ccRCC.
	Category	Dataset	p-value	Molecules
	Inflammatory Response	RCC-BN Metabolite dataset	0.000125	creatine,betaine,citric acid,D-glucose,pyruvic acid
	Inflammatory Response	RCC-AN Metabolite dataset	0.00533	creatine,betaine,citric acid,pyruvic acid
	Inflammatory Response	RCC CD133+/CD24+ cell gene expression dataset	0.00192	NPC1,ABCC4,PAFAH1B1,TNFRSF1A,TICAM1,ITGB2,VCAM1,CX3CL1,IKBKG,NFIC,GNAQ,EDN1,POLB,PON2,--,HBEGF,ALS2,--,--,NOTCH1,TAX1BP1,ATM,BECN1,ABL1,PRKCD,TFPI,CCL2,HIF1A,CSK,BCL2,CTSC,RIPK4,NFE2L2
	Cancer	RCC-BN Metabolite dataset	0.000861	citric acid,D-glucose,pyruvic acid
	Cancer	RCC-AN Metabolite dataset	0.00204	citric acid,creatinine,pyruvic acid
	Cancer	RCC CD133+/CD24+ cell gene expression dataset	8.99e-05	GTF2B,EXOC2,ABCC4,TNFRSF1A,FOXO4,ITGB2,--,PES1,GNAQ,ATP2C1,AFF1,ATP5A1,SRP54,HBP1,--,SCRIB,HBEGF,CFI,LAMA1,BECN1,CTNNAL1,KAT6A,MCTS1,PRKCD,CANT1,CTSC,TUBA4A,--,RNASEH2A,ATF2,--,ARHGEF12,IRS1,MPDZ,EIF3B,PIAS1,SLC12A2,CX3CL1,SQLE,FANCG,PARP14,POLB,--,ARFGEF1,NOTCH1,EP300,--,USP10,--,KDELR2,BCL2,CSK,IDH1,NAB1,FTH1,AFAP1,PGAP3,DYNC2H1,AMACR,PIK3C2A,CRBN,RBL2,HPS3,EMD,MCRS1,TUBA1C,CCT2,UBXN2B,ING2,TME…
	Immune Cell Trafficking	RCC-BN Metabolite dataset	0.00685	creatine,D-glucose
	Immune Cell Trafficking	RCC-AN Metabolite dataset	0.00533	creatine
	Immune Cell Trafficking	RCC CD133+/CD24+ cell gene expression dataset	0.00192	NPC1,PAFAH1B1,TNFRSF1A,TICAM1,ITGB2,VCAM1,CX3CL1,IKBKG,NFIC,GNAQ,CCNC,EDN1,HBEGF,--,--,NOTCH1,TAX1BP1,PRKCD,TFPI,CCL2,HIF1A,CSK,BCL2,CTSC,NFE2L2
	Renal and Urological Disease	RCC-BN Metabolite dataset	0.00685	creatine,betaine,citric acid,D-glucose
	Renal and Urological Disease	RCC-AN Metabolite dataset	0.00533	creatine,betaine,citric acid,creatinine
	Renal and Urological Disease	RCC CD133+/CD24+ cell gene expression dataset	0.00231	TAX1BP1,HMGCR,DBI,TUBA4A,--,--,RPL23,TUBA1C,HSP90AA1,TUBB4B
